# Supplementary material for: Aggregation Condition–Structure Relationship of Mouse Prion Protein Fibrils
Source: MDPI journal article supplement (doi:10.3390/ijms22179635), 2021-09-06
Supplement: s1 [file s1]

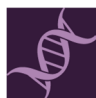

*Supplementary Materials*

# Aggregation Condition–Structure Relationship of Mouse Prion Protein Fibrils

Jēkabs Fridmanis <sup>1</sup>, Zigmantas Toleikis <sup>1,2</sup>, Tomas Sneideris <sup>2,†</sup>, Mantas Ziaunys <sup>2</sup>, Raitis Bobrovs <sup>1</sup>,  
Vytautas Smirnovas <sup>2</sup> and Kristaps Jaudzems <sup>1,\*</sup>

<sup>1</sup> Department of Physical Organic Chemistry, Latvian Institute of Organic Synthesis, Aizkraukles 21, LV-1006 Riga, Latvia; fridmanis.jekabs@osi.lv (J.F.); zigmantas.toleikis@gmc.vu.lt (Z.T.); raitis.bobrovs@osi.lv (R.B.)

<sup>2</sup> Institute of Biotechnology, Life Sciences Center, Vilnius University, LT-10257 Vilnius, Lithuania; sneideris.t@gmail.com (T.S.); mantas.ziaunys@gmc.vu.lt (M.Z.); vytautas.smirnovas@bti.vu.lt (V.S.)

\* Correspondence: kristaps.jaudzems@osi.lv

† Present Address: Yusuf Hamied Department of Chemistry, University of Cambridge, Cambridge CB2 1EW, UK.

## Table of Contents

|                |    |
|----------------|----|
| Figure S1..... | 2  |
| Figure S2..... | 3  |
| Figure S3..... | 4  |
| Figure S4..... | 5  |
| Figure S5..... | 6  |
| Figure S6..... | 7  |
| Table S1.....  | 8  |
| Table S2.....  | 9  |
| Table S3.....  | 10 |
| Table S4.....  | 11 |

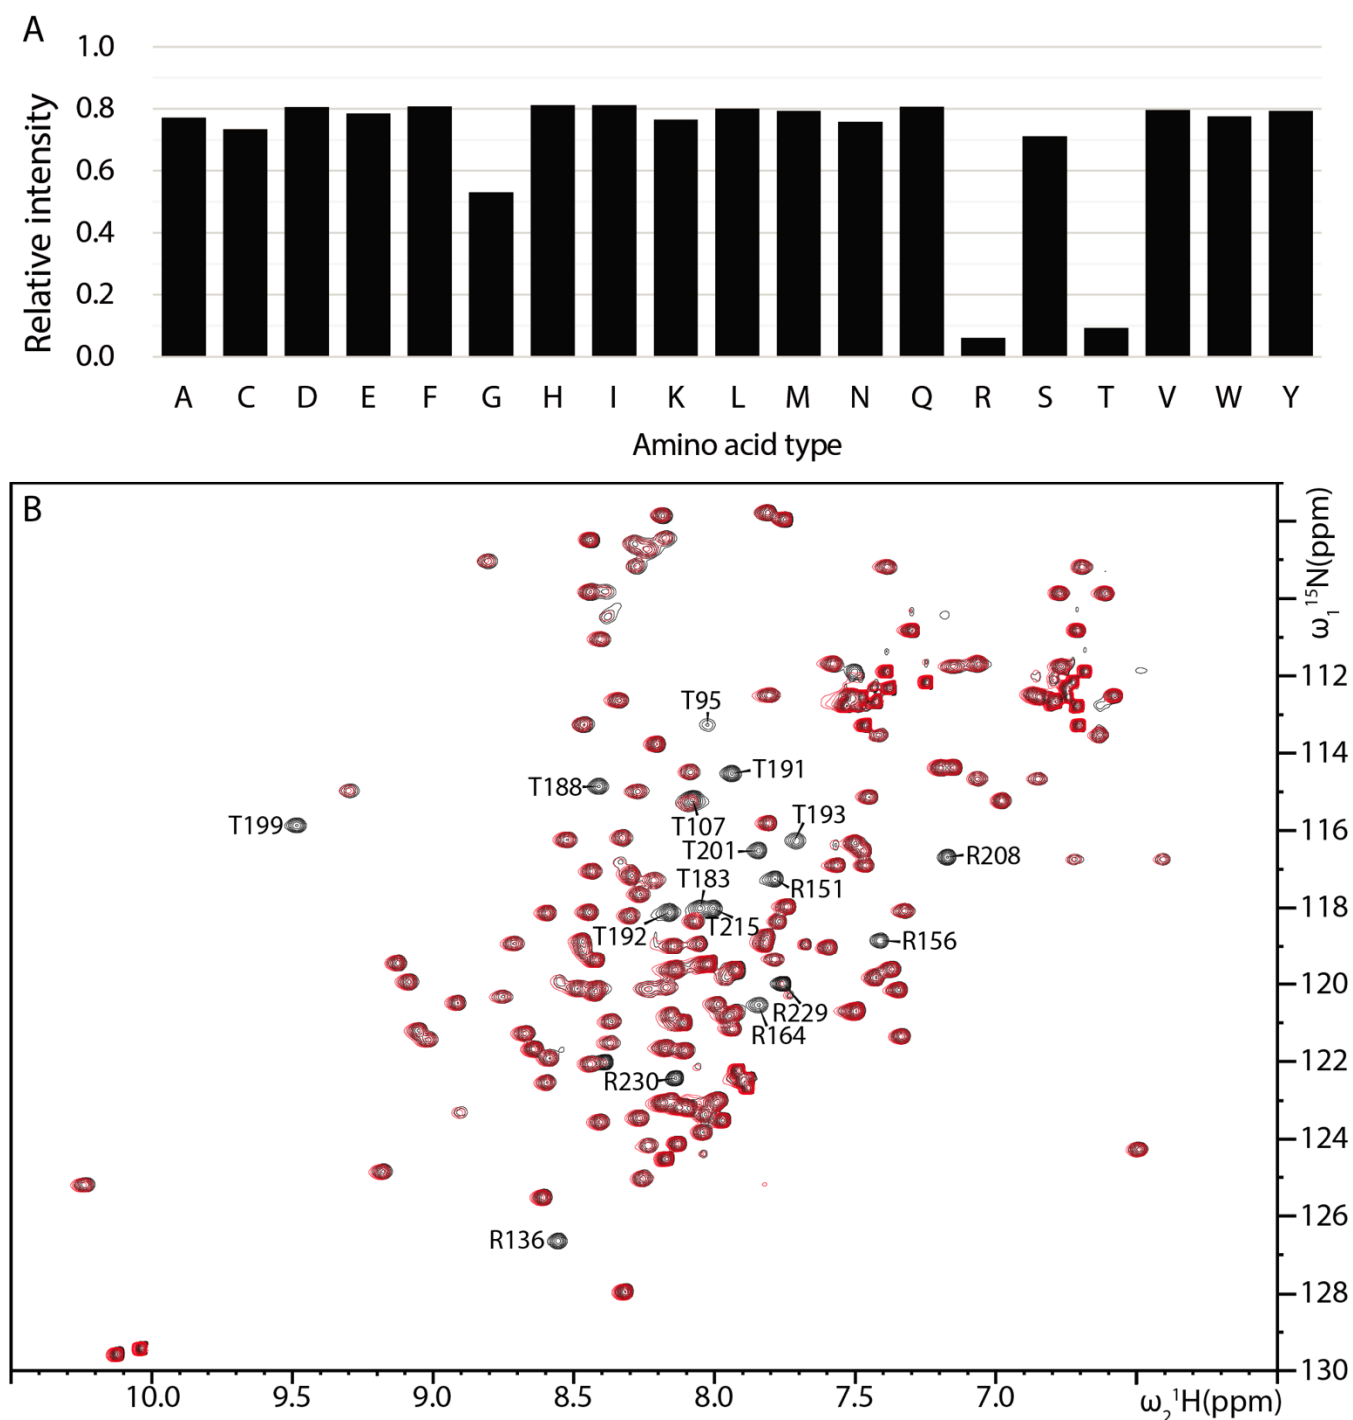

**Figure S1.** Amino acid-selective unlabeled of MoPrP(89-230) analyzed by solution NMR. **(A)** Average peak intensities of each amino acid residue type in  $^{15}\text{N}$ - $^1\text{H}$  HSQC spectra of MoPrP(89-230) samples selectively unlabeled by adding 0.2 g of natural abundance Arg and Thr amino acids per liter of M9 medium relative to uniformly  $^{13}\text{C}$ ,  $^{15}\text{N}$ -labeled samples. **(B)** Overlay of  $^{15}\text{N}$ - $^1\text{H}$  HSQC spectra of fully  $^{13}\text{C}$ ,  $^{15}\text{N}$ -labeled (black) and Thr-, Arg-selectively unlabeled (red) MoPrP(90-230) samples.

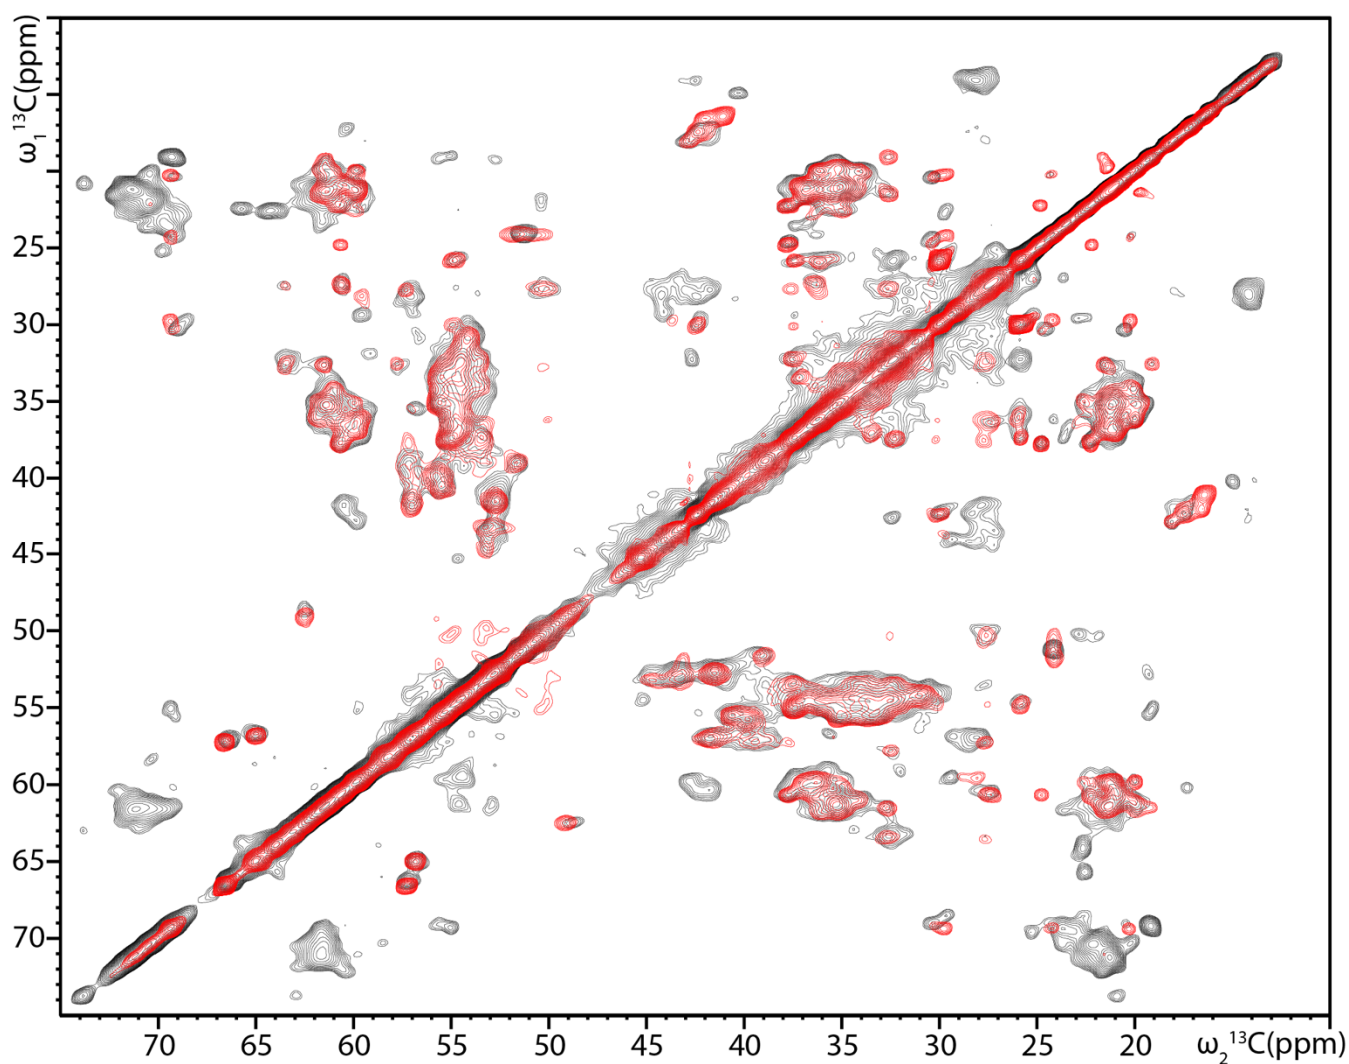

**Figure S2.** Amino acid-selective unlabeled of MoPrP(89-230) analyzed by solid-state NMR. Overlay of 2D DARR MAS NMR spectra of U3G1 fibrils prepared from fully  $^{13}\text{C}$ ,  $^{15}\text{N}$ -labeled (black) and Thr-, Arg-selectively unlabeled (red) MoPrP(90-230) samples. The spectra were recorded at 800 MHz at 273 K with 17 kHz MAS.

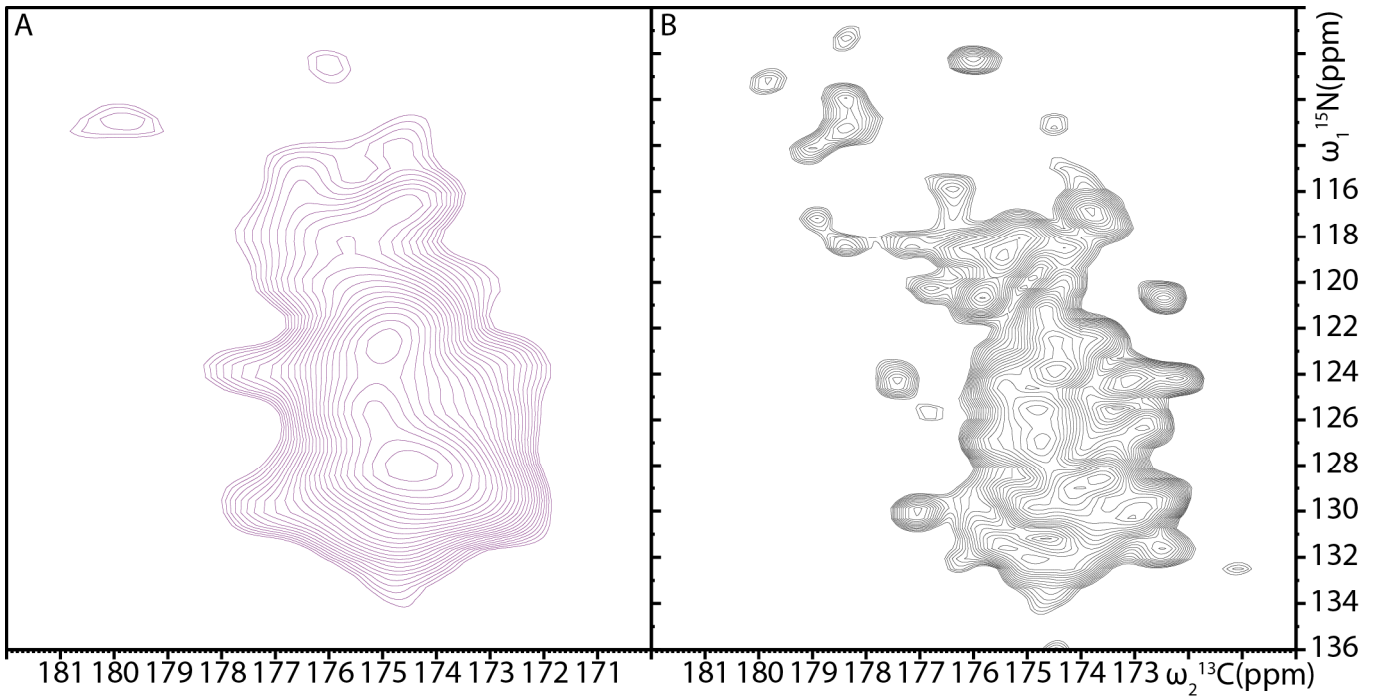

**Figure S3.** Comparison of spontaneously aggregated and sixth-generation reseeded fully  $^{13}\text{C}$ ,  $^{15}\text{N}$ -labeled MoPrP(89-230) U3G1 condition fibrils. **(A)** 2D NCO spectrum of spontaneously aggregated and **(B)** 2D NCO spectrum of sixth-generation fibrils.

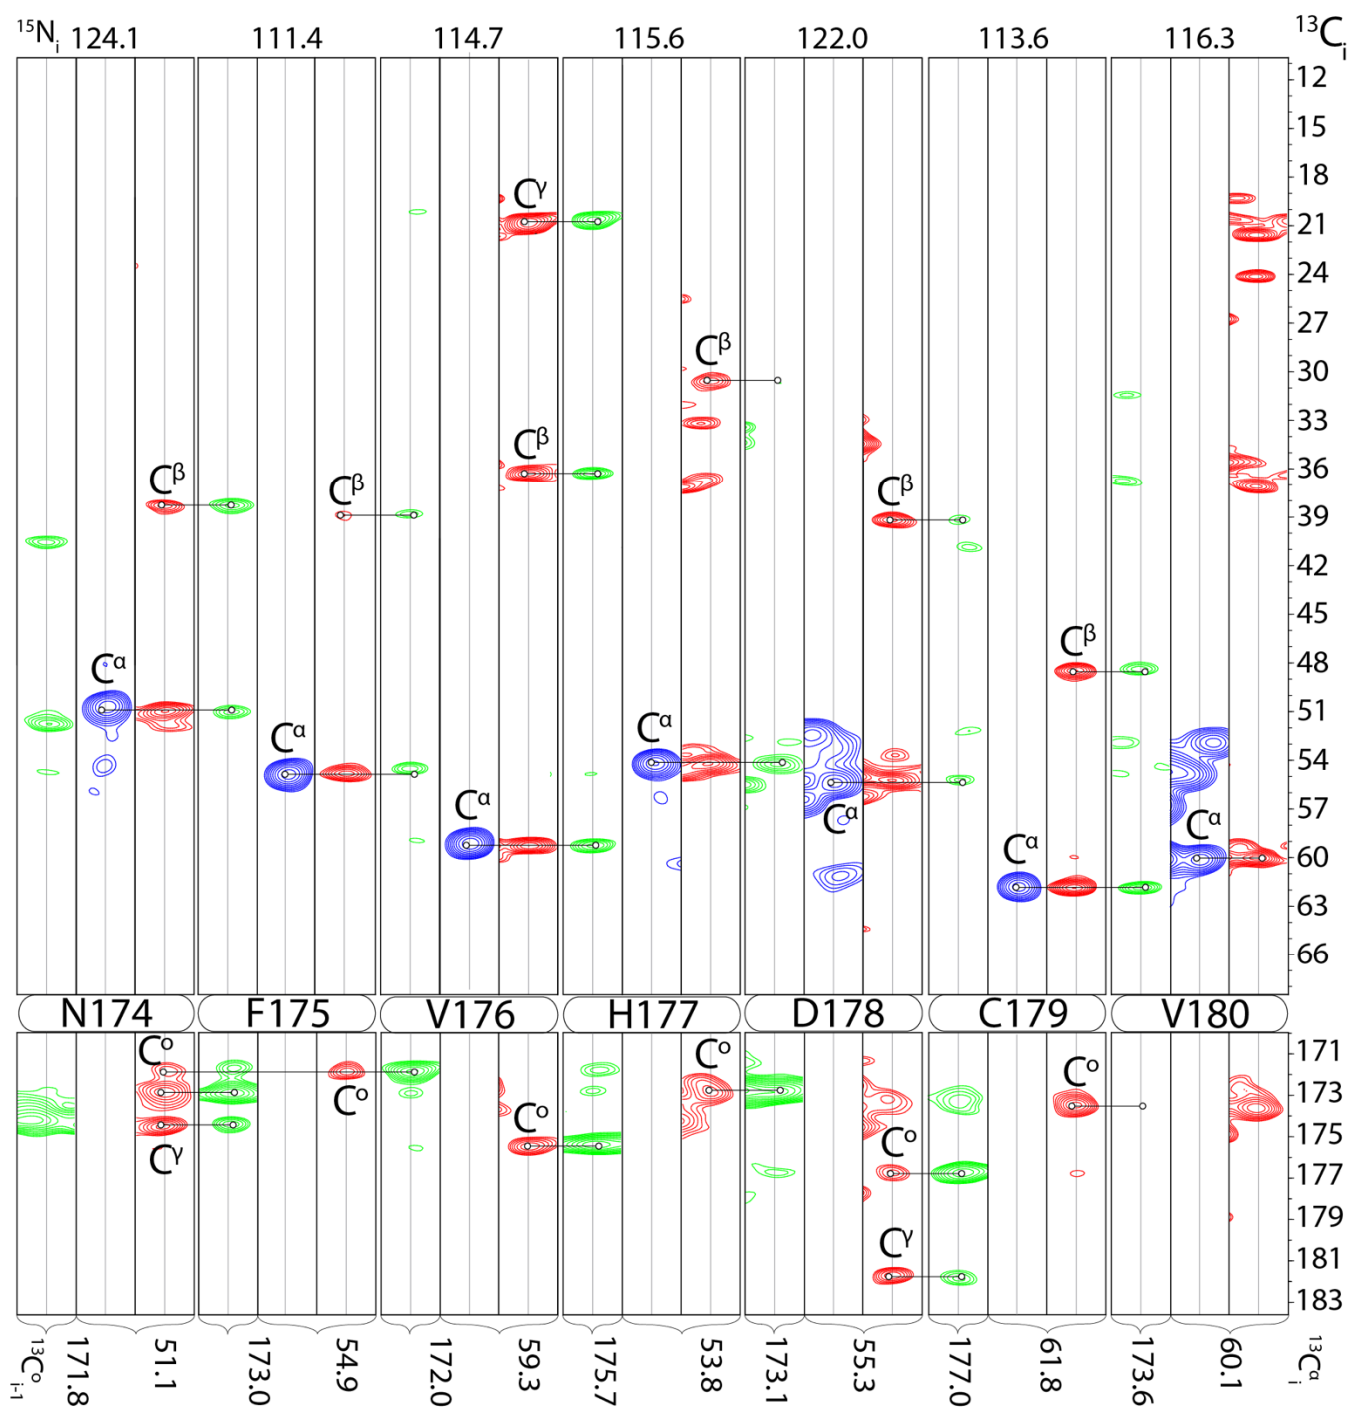

**Figure S4.** Illustration of backbone assignment of MoPrP(89-230) G2 fibrils. Representative strip plot of NCACX (red), CANCO (blue), and NCOCX (green) spectra recorded at 800 MHz and 273 K with 12.5 kHz MAS, mixing time 65 ms (DARR).

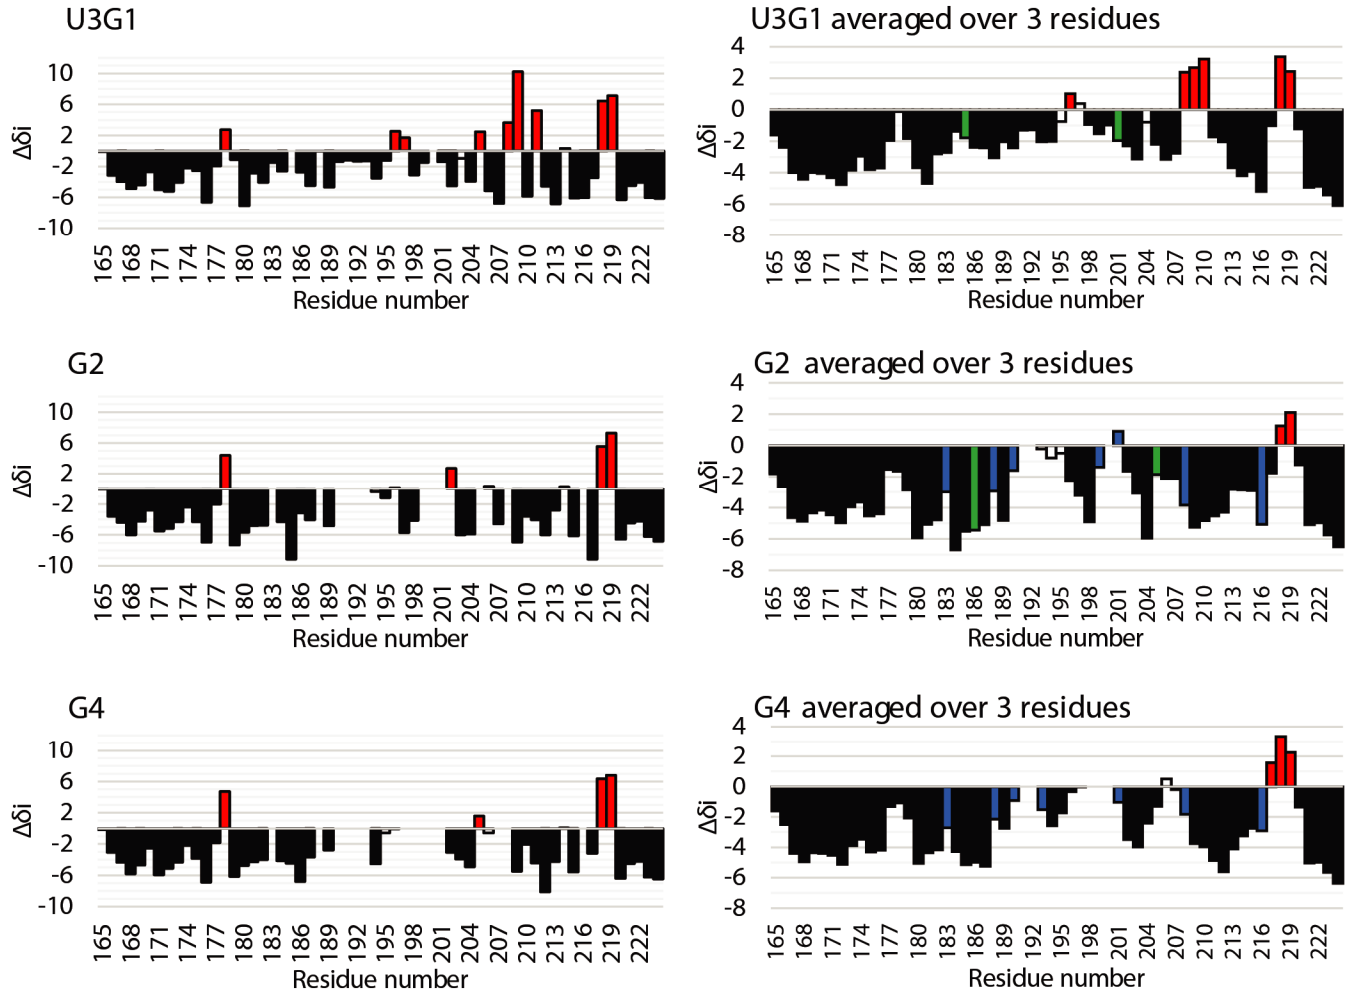

**Figure S5.** Secondary chemical shift analysis of MoPrP(89-230) U3G1, G2 and G4 fibrils. Here  $\Delta\delta_i$  is calculated as  $(\Delta\delta C\alpha_i - \Delta\delta C\beta_i)$  on the left and as  $(\Delta\delta C\alpha_i - \Delta\delta C\beta_i) + (\Delta\delta C\alpha_{i-1} - \Delta\delta C\beta_{i-1}) + (\Delta\delta C\alpha_{i+1} - \Delta\delta C\beta_{i+1})$  on the right, where results are averaged over 3 residues. The one-residue values were used for determination of secondary structures for the assigned residues, whereas values calculated over three residues were used to predict the secondary structures for isolated unassigned residues.  $\Delta\delta_i$  values above 1 are indicative of alpha helix (red), and below -1 of beta sheet (black), whereas  $\Delta\delta_i$  values between -1 and 1 indicate non-regular structure (white). Selectively unlabeled residues are indicated with blue bars and residues with missing assignment are indicated with green bars.

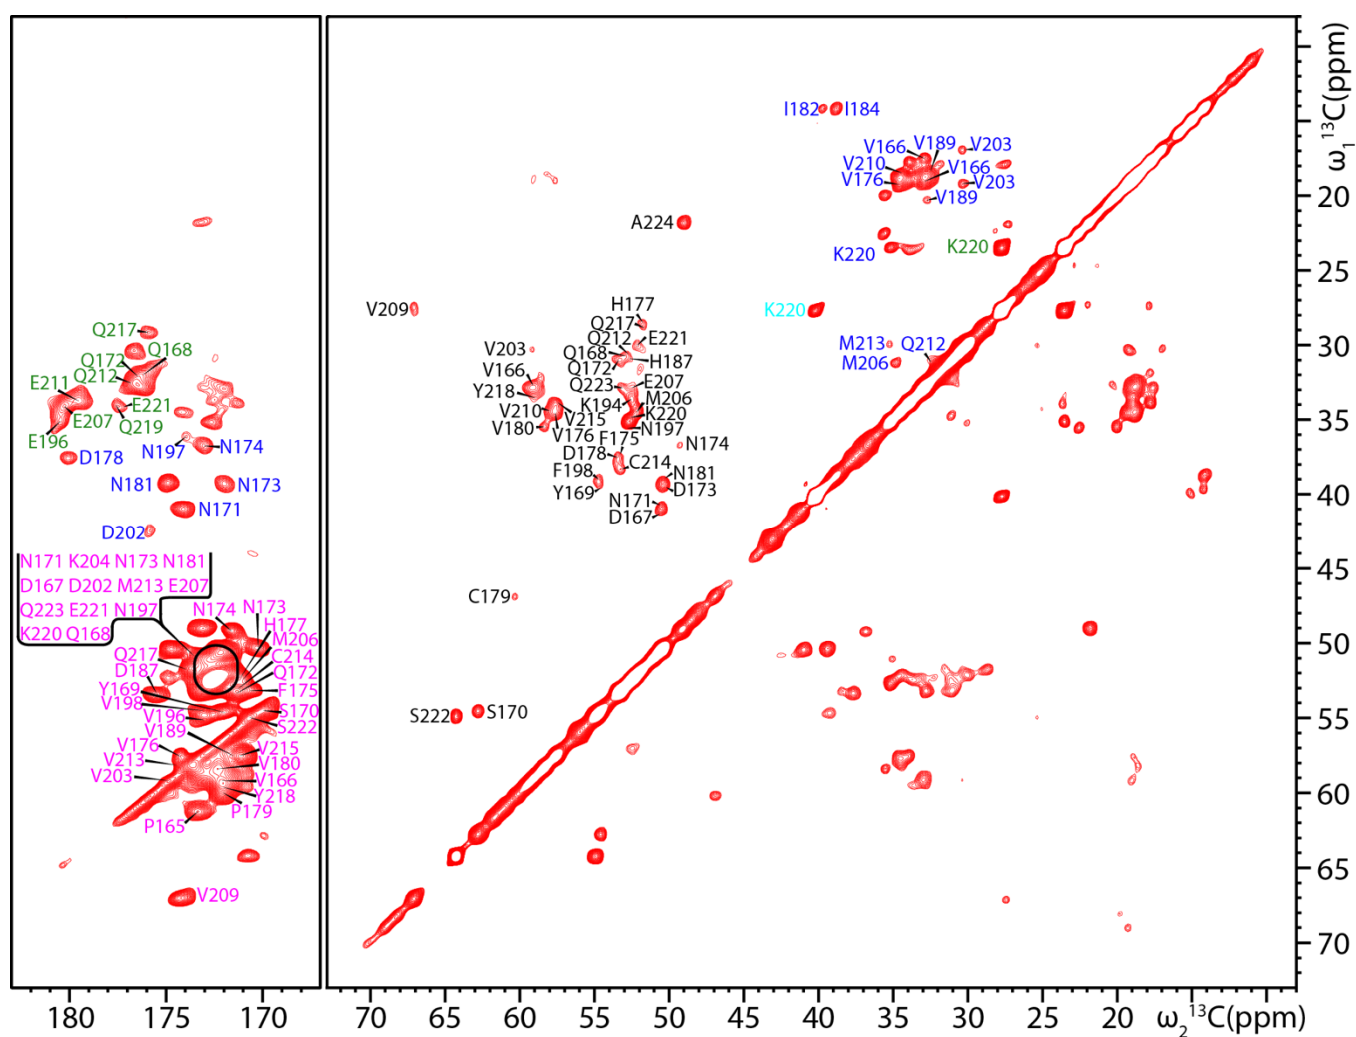

**Figure S6.** Assigned 2D RFDR MAS NMR spectrum of Thr-, Arg-selectively unlabeled MoPrP(89-230) U3G1 fibrils. The spectra were recorded at 800 MHz and 273 K with 17 kHz MAS.

**Table S1.** Acquisition and processing parameters for the MAS NMR spectra of fully-labeled MoPrP(89-230) U3G1 fibrils.

| Spectrum                                                  | MAS Freq. (kHz) | Dec. Field Ampl. (kHz) | Max Indirect Evolution (ms) | Rec. Delay (s) | Scans | Exp. Time    | Window Function               |
|-----------------------------------------------------------|-----------------|------------------------|-----------------------------|----------------|-------|--------------|-------------------------------|
| 2D $^{13}\text{C}$ - $^{13}\text{C}$ DARR (15 ms mixing)  | 17              | 83.3                   | 9.9                         | 2.5            | 32    | 18 h 15 min  | 60° shifted sine-bell squared |
| 2D $^{13}\text{C}$ - $^{13}\text{C}$ RFDR (1.6 ms mixing) | 17              | 83.3                   | 7.7                         | 2.5            | 32    | 13 h 56 min  | 60° shifted sine-bell squared |
| 2D C(HH)C (0.3 ms mixing)                                 | 17              | 83.3                   | 5.5                         | 2.3            | 64    | 33 h 26 min  | 60° shifted sine-bell squared |
| 2D NCO                                                    | 12.5            | 72.0                   | 14.1                        | 2              | 64    | 2 h 18 min   | 60° shifted sine-bell squared |
| 2D NCA                                                    | 12.5            | 72.0                   | 10.6                        | 2              | 64    | 1 h 43 min   | 60° shifted sine-bell         |
| 3D CONCA                                                  | 12.5            | 72.0                   | 5.9 (CO)<br>5.3 (N)         | 2.5            | 64    | 28 h 4 min   | 90° shifted sine-bell         |
| 3D NCOCX (65 ms mixing)                                   | 12.5            | 72.0                   | 9.2 (N)<br>10.8 (CO)        | 2              | 192   | 257 h 33 min | 90° shifted sine-bell squared |
| 3D NCACX (65 ms mixing)                                   | 12.5            | 72.0                   | 7.9 (N)<br>3.9 (CA)         | 2.5            | 192   | 228 h 58 min | 90° shifted sine-bell         |
| 3D CANCO                                                  | 12.5            | 72.0                   | 3.9 (CA)<br>7.9 (N)         | 2.5            | 64    | 74 h 32 min  | 90° shifted sine-bell         |



**Table S2.** Acquisition and processing parameters for the MAS NMR spectra of Thr-, Arg-selectively-unlabeled MoPrP(89-230) U3G1 fibrils.

| Spectrum                                                  | MAS Freq. (kHz) | Dec. Field Ampl. (kHz) | Max Indirect Evolution (ms) | Rec. Delay (s) | Scans | Exp. Time    | Window Function               |
|-----------------------------------------------------------|-----------------|------------------------|-----------------------------|----------------|-------|--------------|-------------------------------|
| 2D $^{13}\text{C}$ - $^{13}\text{C}$ DARR (15 ms mixing)  | 17              | 83.3                   | 7.7                         | 2.5            | 32    | 14 h 8 min   | 60° shifted sine-bell squared |
| 2D $^{13}\text{C}$ - $^{13}\text{C}$ RFDR (1.6 ms mixing) | 17              | 83.3                   | 7.7                         | 2.5            | 32    | 13 h 56 min  | 60° shifted sine-bell squared |
| 2D C(HH)C (0.3 ms mixing)                                 | 17              | 83.3                   | 7.7                         | 2.5            | 256   | 112 h 26 min | 60° shifted sine-bell squared |
| 2D NCO                                                    | 12.5            | 72.0                   | 14.1                        | 2              | 128   | 4 h 37 min   | 60° shifted sine-bell squared |
| 2D NCA                                                    | 12.5            | 72.0                   | 14.1                        | 2              | 128   | 4 h 37 min   | 60° shifted sine-bell         |
| 3D CONCA                                                  | 12.5            | 72.0                   | 5.9 (CO)<br>5.3 (N)         | 2.5            | 320   | 140 h 20 min | 90° shifted sine-bell         |
| 3D NCOCX (65 ms mixing)                                   | 12.5            | 72.0                   | 10.6 (N)<br>10.8 (CO)       | 2              | 256   | 343 h 24 min | 90° shifted sine-bell squared |
| 3D NCACX (65 ms mixing)                                   | 12.5            | 72.0                   | 7.9 (N)<br>3.9 (CA)         | 2.5            | 192   | 228 h 57 min | 90° shifted sine-bell         |
| 3D CANCO                                                  | 12.5            | 72.0                   | 3.9 (CA)<br>7.9 (N)         | 2.5            | 192   | 223 h 30 min | 90° shifted sine-bell         |

**Table S3.** Acquisition and processing parameters for the MAS NMR spectra of Thr-, Arg-selectively-unlabeled MoPrP(89-230) G2 fibrils.

| Spectrum                                                  | MAS Freq. (kHz) | Dec. Field Ampl. (kHz) | Max Indirect Evolution (ms) | Rec. Delay (s) | Scans | Exp. Time    | Window Function               |
|-----------------------------------------------------------|-----------------|------------------------|-----------------------------|----------------|-------|--------------|-------------------------------|
| 2D $^{13}\text{C}$ - $^{13}\text{C}$ DARR (15 ms mixing)  | 17              | 83.3                   | 7.7                         | 2.5            | 32    | 14 h 8 min   | 60° shifted sine-bell squared |
| 2D $^{13}\text{C}$ - $^{13}\text{C}$ RFDR (1.6 ms mixing) | 17              | 83.3                   | 7.7                         | 2.5            | 32    | 13 h 56 min  | 60° shifted sine-bell squared |
| 2D C(HH)C (0.3 ms mixing)                                 | 17              | 83.3                   | 7.7                         | 2.5            | 384   | 168 h 40 min | 60° shifted sine-bell squared |
| 2D NCO                                                    | 12.5            | 72.0                   | 14.1                        | 2              | 128   | 4 h 37 min   | 60° shifted sine-bell squared |
| 2D NCA                                                    | 12.5            | 72.0                   | 14.1                        | 2              | 64    | 2 h 18 min   | 60° shifted sine-bell         |
| 3D CONCA                                                  | 12.5            | 72.0                   | 5.9 (CO)<br>5.3 (N)         | 2.5            | 64    | 28 h 4 min   | 90° shifted sine-bell         |
| 3D NCOCX (65 ms mixing)                                   | 12.5            | 72.0                   | 10.6 (N)<br>10.8 (CO)       | 2              | 64    | 85 h 54 min  | 90° shifted sine-bell squared |
| 3D NCACX (65 ms mixing)                                   | 12.5            | 72.0                   | 7.9 (N)<br>3.9 (CA)         | 2.5            | 64    | 76 h 18 min  | 90° shifted sine-bell         |
| 3D CANCO                                                  | 12.5            | 72.0                   | 3.9 (CA)<br>7.9 (N)         | 2.5            | 64    | 74 h 32 min  | 90° shifted sine-bell         |

**Table S4.** Acquisition and processing parameters for the MAS NMR spectra of Thr-, Arg-selectively-unlabeled MoPrP(89-230) G4 fibrils.

| Spectrum                                                  | MAS Freq. (kHz) | Dec. Field Ampl. (kHz) | Max Indirect Evolution (ms) | Rec. Delay (s) | Scans | Exp. Time    | Window Function               |
|-----------------------------------------------------------|-----------------|------------------------|-----------------------------|----------------|-------|--------------|-------------------------------|
| 2D $^{13}\text{C}$ - $^{13}\text{C}$ DARR (15 ms mixing)  | 17              | 83.3                   | 7.7                         | 2.5            | 64    | 28 h 17 min  | 60° shifted sine-bell squared |
| 2D $^{13}\text{C}$ - $^{13}\text{C}$ RFDR (1.6 ms mixing) | 17              | 83.3                   | 7.7                         | 2.5            | 32    | 13 h 56 min  | 60° shifted sine-bell squared |
| 2D C(HH)C (0.3 ms mixing)                                 | 17              | 83.3                   | 7.7                         | 2.5            | 384   | 168 h 40 min | 60° shifted sine-bell squared |
| 2D NCO                                                    | 12.5            | 72.0                   | 14.1                        | 2              | 64    | 2 h 18 min   | 60° shifted sine-bell squared |
| 2D NCA                                                    | 12.5            | 72.0                   | 14.1                        | 2              | 64    | 2 h 18 min   | 60° shifted sine-bell         |
| 3D CONCA                                                  | 12.5            | 72.0                   | 5.9 (CO)<br>5.3 (N)         | 2.5            | 128   | 56 h 7 min   | 90° shifted sine-bell         |
| 3D NCOCX (65 ms mixing)                                   | 12.5            | 72.0                   | 10.6 (N)<br>10.8 (CO)       | 2              | 256   | 343 h 20 min | 90° shifted sine-bell squared |
| 3D NCACX (65 ms mixing)                                   | 12.5            | 72.0                   | 7.9 (N)<br>3.9 (CA)         | 2.5            | 256   | 305 h 10 min | 90° shifted sine-bell         |
| 3D CANCO                                                  | 12.5            | 72.0                   | 3.9 (CA)<br>7.9 (N)         | 2.5            | 128   | 149 h 52 min | 90° shifted sine-bell         |
